# Supplementary material for: Adsorption behavior of chloramphenicol on an activated carbon from pomelo peel using KHCO3 activator
Source: Royal Society of Chemistry journal article supplement (doi:10.1039/d3nj05838g), 2024-01-01
Supplement: d3nj05838g1.pdf [file d3nj05838g1.pdf]

## Adsorption behavior of chloramphenicol on an activated carbon from pomelo peel using $\text{KHCO}_3$ activator

Haixia Li,<sup>\*a</sup> Hai Zhu,<sup>b</sup> Junqiang Qiu,<sup>a</sup> Danning Zheng,<sup>a</sup> Lifang Gao,<sup>a</sup> Dan Zhou,<sup>\*a</sup> and Dan Xu<sup>\*a</sup>

<sup>a</sup>Key Laboratory of Tropical Translational Medicine of Ministry of Education, Hainan Provincial

Key Laboratory for Research and Development of Tropical Herbs, Haikou

Key Laboratory of Li Nationality Medicine, School of Pharmacy, Hainan Medical University

Haikou 571119, China, Email: lihx0801@163.com; zhoudan1014@126.com; xudan@hainmc.edu.cn.

<sup>b</sup>School of Traditional Chinese Materia Medica, Shenyang Pharmaceutical University, Shenyang 110016, China

### Supporting Figures

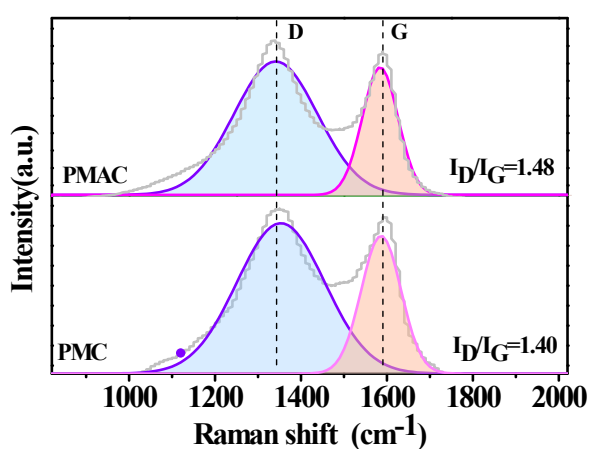

Fig. S.1 Raman spectra of PMAC by  $\text{KHCO}_3$  as an activator

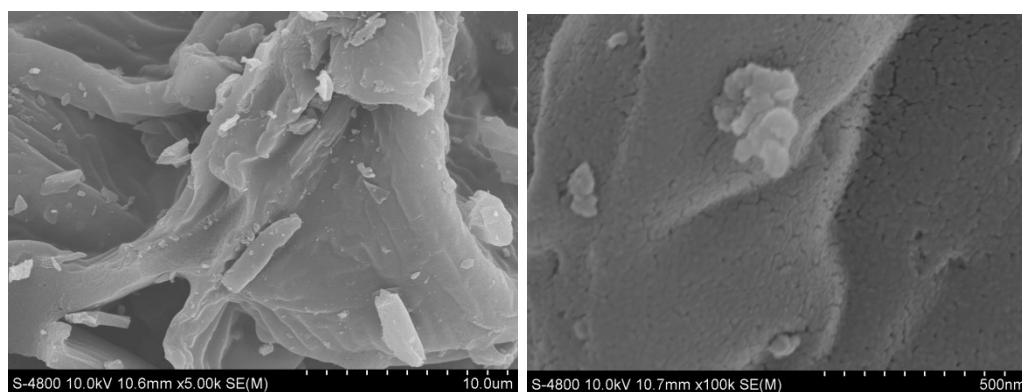

Fig. S.2 SEM of PMAC by  $\text{KHCO}_3$  as an activator

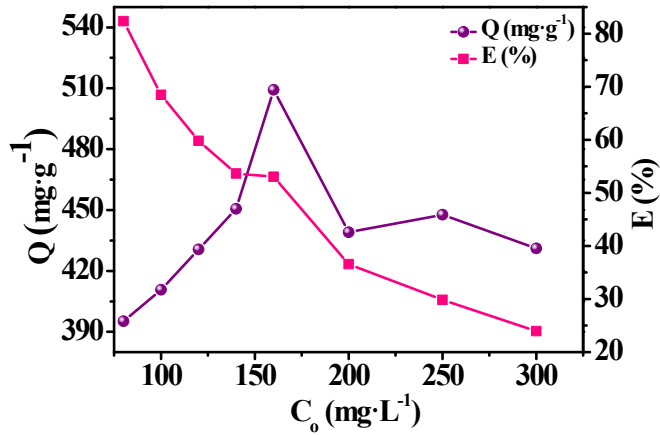

Fig.S.3 The effect of the initial CHL concentration on the adsorption capacity through PMAC by  $\text{KHCO}_3$  as an activator. Adsorption conditions:  $m = 5$  mg,  $\text{pH} = 5$ ;  $T = 298$  K.

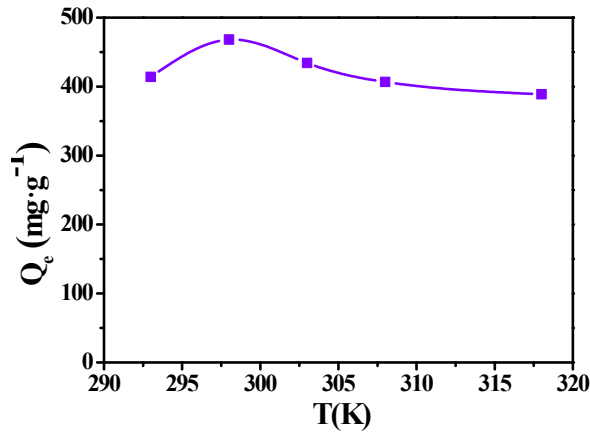

Fig.S.4 The effect of temperature on the adsorption capacity for CHL through PMAC by  $\text{KHCO}_3$  as an activator. Adsorption conditions:  $C_0 = 150$  mg·L<sup>-1</sup>,  $m = 5$  mg,  $\text{pH} = 5$ .

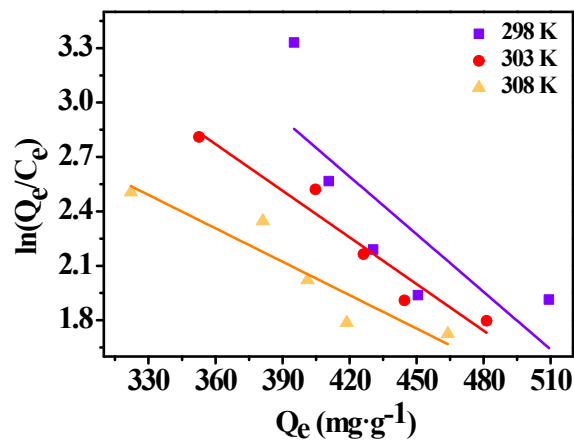

Fig. S.5 Plots of  $\ln(Q_{eq}/C_{eq})$  as a function of  $Q_{eq}$  for the adsorption of CHL through PMAC by  $\text{KHCO}_3$  as an activator. Adsorption conditions:  $m = 5$  mg,  $\text{pH} = 5$ ,  $T = 298, 303, 308$  K.

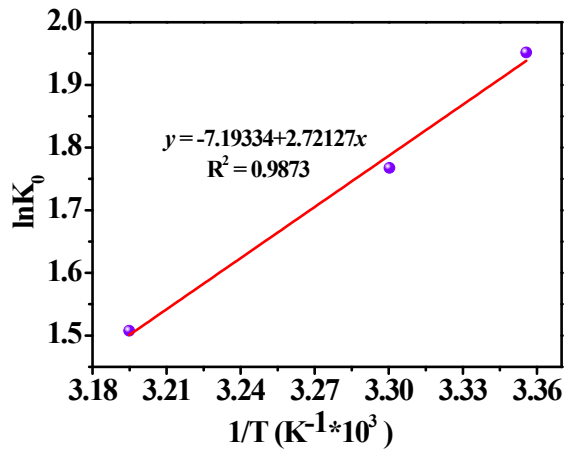

Fig.S.6 the plot of  $\ln(K_0)$  versus  $1/T$  for the adsorption of CHL through PMAC by  $\text{KHCO}_3$  as an activator. Adsorption conditions:  $m = 5$  mg,  $\text{pH} = 5$ ,  $T=298, 303, 308$  K.

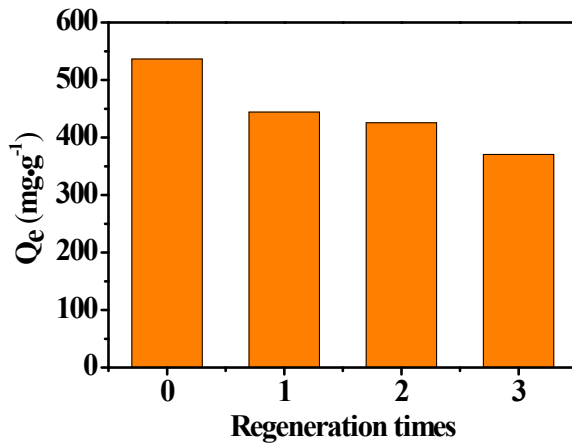

Fig.S.7 Reusability performance for CHL adsorption onto PMAC by  $\text{KHCO}_3$  as activator. Adsorption conditions:  $C_o = 150$   $\text{mg}\cdot\text{L}^{-1}$ ,  $m = 5$  mg,  $\text{pH} = 5$ ;  $T= 298\text{K}$ .

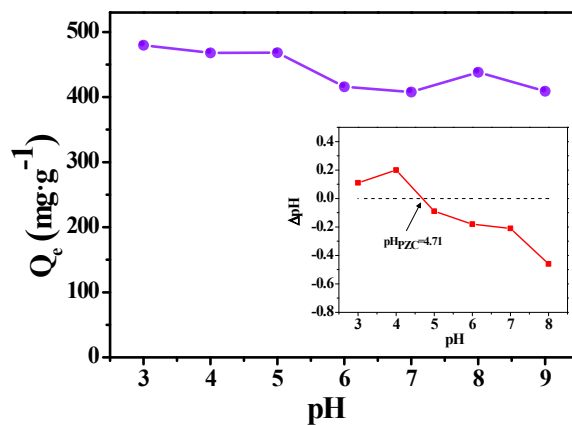

Fig.S.8 The effect of  $\text{pH}$  on the adsorption capacity for CHL through PMAC by  $\text{KHCO}_3$  as an activator. Adsorption conditions:  $C_o = 150$   $\text{mg}\cdot\text{L}^{-1}$ ,  $m = 5$  mg;  $T = 298$  K.

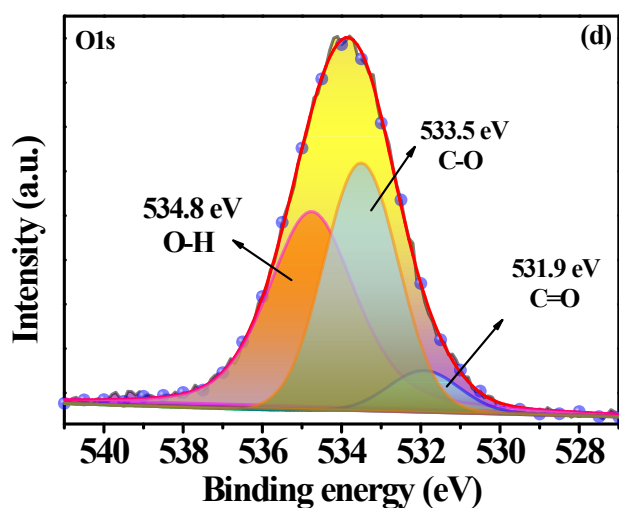

Fig.S.9 XPS deconvolution spectra O1s peak of PMAC by  $\text{KHCO}_3$  as an activator

## Supporting Tables

**Table S.1** Adsorption capacity of CHL adsorbed by various adsorbents

| Adsorbent             | Activator               | CHL concentration<br>( $\text{mg}\cdot\text{L}^{-1}$ ) | Adsorbent dosage<br>( $\text{mg}\cdot\text{L}^{-1}$ ) | $S_{BET}$<br>( $\text{m}^2\cdot\text{g}^{-1}$ ) | $Q_m$<br>( $\text{mg}\cdot\text{g}^{-1}$ ) | Refs.     |
|-----------------------|-------------------------|--------------------------------------------------------|-------------------------------------------------------|-------------------------------------------------|--------------------------------------------|-----------|
| grape slurry          | NaOH                    | 5                                                      | 1600                                                  | -                                               | 3.104                                      | [5]       |
| Coconut fiber         | KOH                     | 250                                                    | 200                                                   | 1755                                            | 523                                        | [10]      |
| Sodium lignosulfonate | $\text{K}_2\text{CO}_3$ | 120                                                    | 150                                                   | 1305.5                                          | 534.0                                      | [44]      |
| Cigarette butts       | $\text{K}_2\text{CO}_3$ | 50                                                     | 100                                                   | 1421.27                                         | 450.13                                     | [45]      |
| Coconut husk          | $\text{NaHCO}_3$        | 25                                                     | 1000                                                  | 438.2                                           | 4.32                                       | [46]      |
| Peanut shell          | Ammonium polyphosphate  | 300                                                    | 1000                                                  | $979\pm 25$                                     | 423.7                                      | [47]      |
| Corn stover           | -                       | 30                                                     | 8000                                                  | 961.8                                           | 32.3                                       | [48]      |
| Sawdust               | $\text{H}_3\text{PO}_4$ | 40                                                     | 450                                                   | 303-1298                                        | 176                                        | [49]      |
| Pomelo peel           | KOH                     | 150                                                    | 167                                                   | 1608                                            | 477                                        | This work |
| Pomelo peel           | $\text{KHCO}_3$         | 150                                                    | 167                                                   | 1608                                            | 549                                        | This work |
